# Supplementary material
Source: MDPI journal article supplement (https://www.mdpi.com/1424-8247/14/11/1159)
Supplement: s1 [file s1]

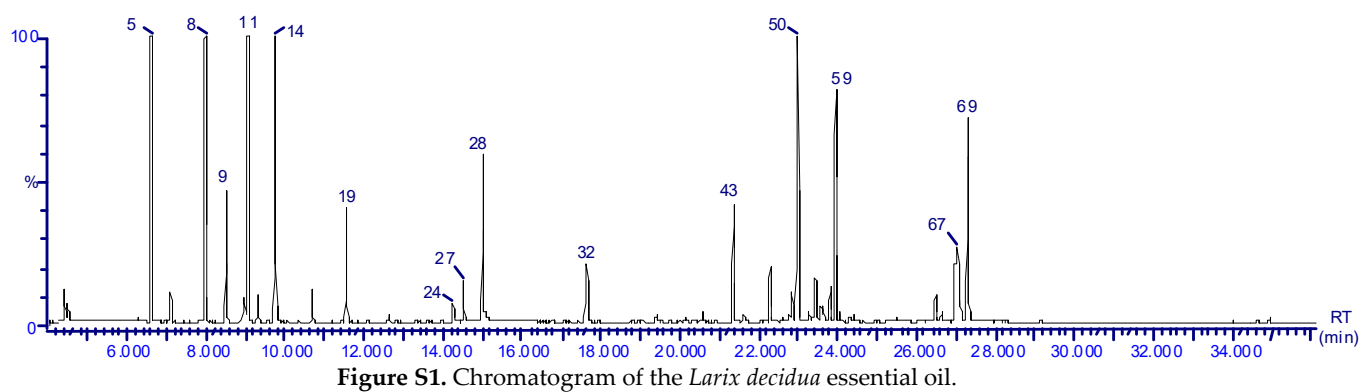

**Figure S1.** Chromatogram of the *Larix decidua* essential oil.

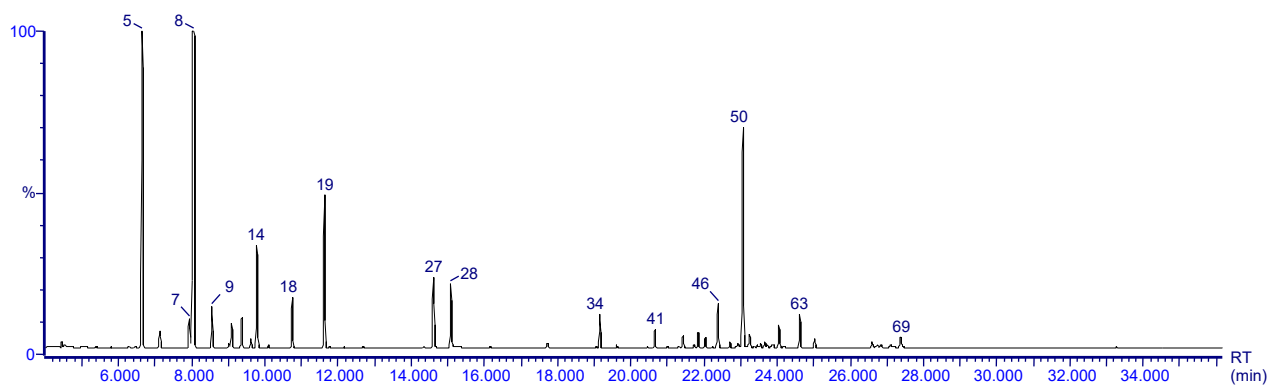

**Figure S2.** Chromatogram of the *Pseudotsuga menziesii* essential oil.

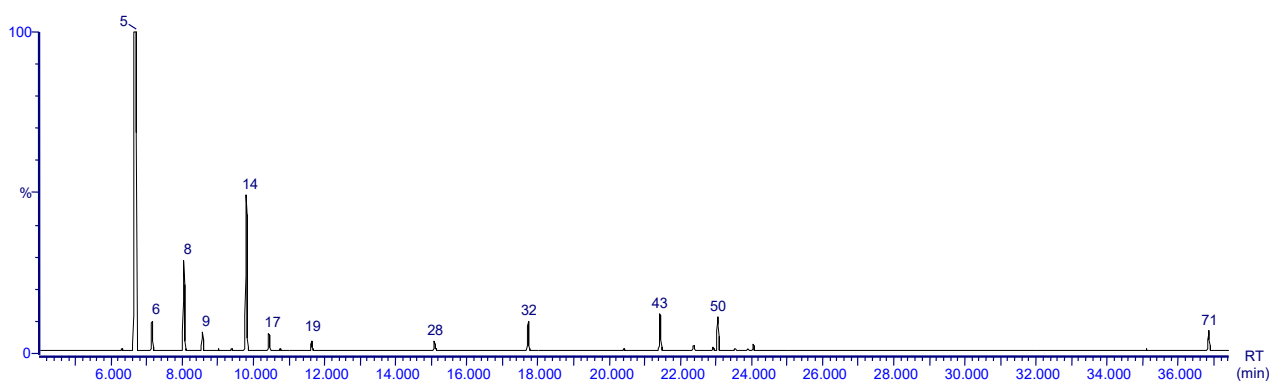

**Figure S3.** Chromatogram of the *Pinus nigra* volatile essential oil.
